# Supplementary material
Source: ML conference proceedings conference paper supplement (https://proceedings.neurips.cc/paper_files/paper/2022/hash/0b4145b562cc22fb7fa50a2cd17c191d-Abstract.html)
Supplement: Supplementary file 1 [file 0b4145b562cc22fb7fa50a2cd17c191d-Supplemental-Conference.zip]

Archive with 77 entries (60 files):
- Appendix.pdf
- ldsa_code/
- ldsa_code/docker/
- ldsa_code/docker/build.sh
- ldsa_code/docker/Dockerfile
- ldsa_code/docker/Dockerfile.bak
- ldsa_code/install_sc2.sh
- ldsa_code/LICENSE
- ldsa_code/README.md
- ldsa_code/requirements.txt
- ldsa_code/run.sh
- ldsa_code/run_interactive.sh
- ldsa_code/src/
- ldsa_code/src/.gitignore
- ldsa_code/src/__init__.py
- ldsa_code/src/components/
- ldsa_code/src/components/__init__.py
- ldsa_code/src/components/action_selectors.py
- ldsa_code/src/components/episode_buffer.py
- ldsa_code/src/components/epsilon_schedules.py
- ldsa_code/src/components/transforms.py
- ldsa_code/src/config/
- ldsa_code/src/config/algs/
- ldsa_code/src/config/algs/coma.yaml
- ldsa_code/src/config/algs/iql.yaml
- ldsa_code/src/config/algs/ldsa.yaml
- ldsa_code/src/config/algs/qmix.yaml
- ldsa_code/src/config/algs/qtran.yaml
- ldsa_code/src/config/algs/vdn.yaml
- ldsa_code/src/config/default.yaml
- ldsa_code/src/config/envs/
- ldsa_code/src/config/envs/academy_3_vs_1_with_keeper.yaml
- ldsa_code/src/config/envs/academy_counterattack_easy.yaml
- ldsa_code/src/config/envs/sc2.yaml
- ldsa_code/src/config/envs/sc2_beta.yaml
- ldsa_code/src/controllers/
- ldsa_code/src/controllers/__init__.py
- ldsa_code/src/controllers/basic_controller.py
- ldsa_code/src/controllers/ldsa_controller.py
- ldsa_code/src/envs/
- ldsa_code/src/envs/__init__.py
- ldsa_code/src/envs/grf/
- ldsa_code/src/envs/grf/__init__.py
- ldsa_code/src/envs/grf/academy_3_vs_1_with_keeper.py
- ldsa_code/src/envs/grf/academy_counterattack_easy.py
- ldsa_code/src/envs/multiagentenv.py
- ldsa_code/src/learners/
- ldsa_code/src/learners/__init__.py
- ldsa_code/src/learners/coma_learner.py
- ldsa_code/src/learners/ldsa_learner.py
- ldsa_code/src/learners/q_learner.py
- ldsa_code/src/learners/qtran_learner.py
- ldsa_code/src/main.py
- ldsa_code/src/modules/
- ldsa_code/src/modules/__init__.py
- ldsa_code/src/modules/agents/
- ldsa_code/src/modules/agents/__init__.py
- ldsa_code/src/modules/agents/ldsa_agent.py
- ldsa_code/src/modules/agents/rnn_agent.py
- ldsa_code/src/modules/critics/
- ldsa_code/src/modules/critics/__init__.py
- ldsa_code/src/modules/critics/coma.py
- ldsa_code/src/modules/mixers/
- ldsa_code/src/modules/mixers/__init__.py
- ldsa_code/src/modules/mixers/qmix.py
- ldsa_code/src/modules/mixers/qtran.py
- ldsa_code/src/modules/mixers/vdn.py
- ldsa_code/src/run.py
- ldsa_code/src/runners/
- ldsa_code/src/runners/__init__.py
- ldsa_code/src/runners/episode_runner.py
- ldsa_code/src/runners/parallel_runner.py
- ldsa_code/src/utils/
- ldsa_code/src/utils/dict2namedtuple.py
- ldsa_code/src/utils/logging.py
- ldsa_code/src/utils/rl_utils.py
- ldsa_code/src/utils/timehelper.py
