# Supplementary material
Source: ML conference proceedings conference paper supplement (https://proceedings.neurips.cc/paper_files/paper/2022/hash/0b4145b562cc22fb7fa50a2cd17c191d-Abstract.html)
Supplement: Supplementary file 1 [file 0b4145b562cc22fb7fa50a2cd17c191d-Supplemental-Conference.zip › ldsa_code/docker/Dockerfile]

FROM pytorch/pytorch:1.8.0-cuda11.1-cudnn8-runtime
MAINTAINER Tabish Rashid

# CUDA includes
ENV CUDA_PATH /usr/local/cuda
ENV CUDA_INCLUDE_PATH /usr/local/cuda/include
ENV CUDA_LIBRARY_PATH /usr/local/cuda/lib64

# Ubuntu Packages
RUN apt-get update -y && apt-get install software-properties-common -y && \
    add-apt-repository -y multiverse && apt-get update -y && apt-get upgrade -y && \
    apt-get install -y apt-utils nano vim man build-essential wget sudo && \
    rm -rf /var/lib/apt/lists/*

# Install curl and other dependencies
RUN apt-get update -y && apt-get install -y curl libssl-dev openssl libopenblas-dev \
    libhdf5-dev hdf5-helpers hdf5-tools libhdf5-serial-dev libprotobuf-dev protobuf-compiler git


# Python packages we use (or used at one point...)
RUN pip3 install numpy scipy pyyaml matplotlib
RUN pip3 install imageio
RUN pip3 install tensorboard-logger
RUN pip3 install pygame

RUN mkdir /install
WORKDIR /install

RUN pip3 install jsonpickle==0.9.6
# install Sacred (from OxWhirl fork)
RUN pip3 install setuptools
RUN git clone https://github.com/oxwhirl/sacred.git /install/sacred && cd /install/sacred && python3 setup.py install

#### -------------------------------------------------------------------
#### install pytorch
#### -------------------------------------------------------------------

## -- SMAC
RUN pip3 install git+https://github.com/oxwhirl/smac.git
ENV SC2PATH /pymarl/3rdparty/StarCraftII

WORKDIR /pymarl
