# Supplementary material
Source: ML conference proceedings conference paper supplement (https://proceedings.neurips.cc/paper_files/paper/2022/hash/0b4145b562cc22fb7fa50a2cd17c191d-Abstract.html)
Supplement: Supplementary file 1 [file 0b4145b562cc22fb7fa50a2cd17c191d-Supplemental-Conference.zip › ldsa_code/run.sh]

#!/bin/bash
HASH=$(cat /dev/urandom | tr -dc 'a-zA-Z0-9' | fold -w 4 | head -n 1)
GPU=$1
name=${USER}_pymarl_GPU_${GPU}_${HASH}

echo "Launching container named '${name}' on GPU '${GPU}'"
# Launches a docker container using our image, and runs the provided command

if hash nvidia-docker 2>/dev/null; then
  cmd=nvidia-docker
else
  cmd=docker
fi

NV_GPU="$GPU" ${cmd} run \
    --name $name \
    --user $(id -u):$(id -g) \
    -v `pwd`:/pymarl \
    -t pymarl:1.0 \
    ${@:2}
