# Supplementary material
Source: ML conference proceedings conference paper supplement (https://proceedings.neurips.cc/paper_files/paper/2022/hash/0b4145b562cc22fb7fa50a2cd17c191d-Abstract.html)
Supplement: Supplementary file 1 [file 0b4145b562cc22fb7fa50a2cd17c191d-Supplemental-Conference.zip › ldsa_code/src/components/epsilon_schedules.py]

import numpy as np


class DecayThenFlatSchedule():

    def __init__(self,
                 start,
                 finish,
                 time_length,
                 decay="exp"):

        self.start = start
        self.finish = finish
        self.time_length = time_length
        self.delta = (self.start - self.finish) / self.time_length
        self.decay = decay

        if self.decay in ["exp"]:
            self.exp_scaling = (-1) * self.time_length / np.log(self.finish) if self.finish > 0 else 1

    def eval(self, T):
        if self.decay in ["linear"]:
            return max(self.finish, self.start - self.delta * T)
        elif self.decay in ["exp"]:
            return min(self.start, max(self.finish, np.exp(- T / self.exp_scaling)))
    pass
