# Supplementary material
Source: ML conference proceedings conference paper supplement (https://proceedings.neurips.cc/paper_files/paper/2022/hash/0b4145b562cc22fb7fa50a2cd17c191d-Abstract.html)
Supplement: Supplementary file 1 [file 0b4145b562cc22fb7fa50a2cd17c191d-Supplemental-Conference.zip › ldsa_code/src/components/transforms.py]

import torch as th


class Transform:
    def transform(self, tensor):
        raise NotImplementedError

    def infer_output_info(self, vshape_in, dtype_in):
        raise NotImplementedError


class OneHot(Transform):
    def __init__(self, out_dim):
        self.out_dim = out_dim

    def transform(self, tensor):
        y_onehot = tensor.new(*tensor.shape[:-1], self.out_dim).zero_()
        y_onehot.scatter_(-1, tensor.long(), 1)
        return y_onehot.float()

    def infer_output_info(self, vshape_in, dtype_in):
        return (self.out_dim,), th.float32
