# Supplementary material
Source: ML conference proceedings conference paper supplement (https://proceedings.neurips.cc/paper_files/paper/2022/hash/0b4145b562cc22fb7fa50a2cd17c191d-Abstract.html)
Supplement: Supplementary file 1 [file 0b4145b562cc22fb7fa50a2cd17c191d-Supplemental-Conference.zip › ldsa_code/src/config/algs/coma.yaml]

# --- COMA specific parameters ---

action_selector: "multinomial"
epsilon_start: .5
epsilon_finish: .01
epsilon_anneal_time: 100000
mask_before_softmax: False

runner: "parallel"

buffer_size: 8
batch_size_run: 8
batch_size: 8

env_args:
  state_last_action: False # critic adds last action internally

# update the target network every {} training steps
target_update_interval: 200

lr: 0.0005
critic_lr: 0.0005
td_lambda: 0.8

# use COMA
agent_output_type: "pi_logits"
learner: "coma_learner"
critic_q_fn: "coma"
critic_baseline_fn: "coma"
critic_train_mode: "seq"
critic_train_reps: 1
q_nstep: 0  # 0 corresponds to default Q, 1 is r + gamma*Q, etc

name: "coma"
