# Supplementary material
Source: ML conference proceedings conference paper supplement (https://proceedings.neurips.cc/paper_files/paper/2022/hash/0b4145b562cc22fb7fa50a2cd17c191d-Abstract.html)
Supplement: Supplementary file 1 [file 0b4145b562cc22fb7fa50a2cd17c191d-Supplemental-Conference.zip › ldsa_code/src/config/algs/iql.yaml]

# --- QMIX specific parameters ---

# use epsilon greedy action selector
action_selector: "epsilon_greedy"
epsilon_start: 1.0
epsilon_finish: 0.05
epsilon_anneal_time: 50000

runner: "episode"

buffer_size: 5000

# update the target network every {} episodes
target_update_interval: 200

# use the Q_Learner to train
agent_output_type: "q"
learner: "q_learner"
double_q: True
mixer: # Mixer becomes None

name: "iql"
