# Supplementary material
Source: ML conference proceedings conference paper supplement (https://proceedings.neurips.cc/paper_files/paper/2022/hash/0b4145b562cc22fb7fa50a2cd17c191d-Abstract.html)
Supplement: Supplementary file 1 [file 0b4145b562cc22fb7fa50a2cd17c191d-Supplemental-Conference.zip › ldsa_code/src/config/envs/academy_counterattack_easy.yaml]

env: academy_counterattack_easy # google research football

env_args:
  map_name: ""
  dense_reward: False
  write_full_episode_dumps: False
  write_goal_dumps: False
  dump_freq: 1000
  render: False
  n_agents: 4
  time_limit: 150
  time_step: 0
  obs_dim: 30
  env_name: "academy_counterattack_easy"
  stacked: False
  representation: "simple115"
  rewards: "scoring"
  logdir: "football_dumps"
  write_video: False
  number_of_right_players_agent_controls: 0
  seed: 0

test_greedy: True
test_nepisode: 20
test_interval: 10000
log_interval: 10000
runner_log_interval: 10000
learner_log_interval: 10000
t_max: 4050000
