# Supplementary material
Source: ML conference proceedings conference paper supplement (https://proceedings.neurips.cc/paper_files/paper/2022/hash/0b4145b562cc22fb7fa50a2cd17c191d-Abstract.html)
Supplement: Supplementary file 1 [file 0b4145b562cc22fb7fa50a2cd17c191d-Supplemental-Conference.zip › ldsa_code/src/envs/__init__.py]

from functools import partial
from smac.env import MultiAgentEnv, StarCraft2Env
from .grf import Academy_3_vs_1_with_Keeper, Academy_Counterattack_Easy
import sys
import os

def env_fn(env, **kwargs) -> MultiAgentEnv:
    return env(**kwargs)

REGISTRY = {}
REGISTRY["sc2"] = partial(env_fn, env=StarCraft2Env)
REGISTRY["academy_3_vs_1_with_keeper"]= partial(env_fn, env=Academy_3_vs_1_with_Keeper)
REGISTRY["academy_counterattack_easy"]= partial(env_fn, env=Academy_Counterattack_Easy)

if sys.platform == "linux":
    os.environ.setdefault("SC2PATH",
                          os.path.join(os.getcwd(), "3rdparty", "StarCraftII"))
