# Supplementary material
Source: ML conference proceedings conference paper supplement (https://proceedings.neurips.cc/paper_files/paper/2022/hash/0b4145b562cc22fb7fa50a2cd17c191d-Abstract.html)
Supplement: Supplementary file 1 [file 0b4145b562cc22fb7fa50a2cd17c191d-Supplemental-Conference.zip › ldsa_code/src/learners/__init__.py]

from .q_learner import QLearner
from .coma_learner import COMALearner
from .qtran_learner import QLearner as QTranLearner
from .ldsa_learner import LDSALearner

REGISTRY = {}

REGISTRY["q_learner"] = QLearner
REGISTRY["coma_learner"] = COMALearner
REGISTRY["qtran_learner"] = QTranLearner
REGISTRY["ldsa_learner"] = LDSALearner
