# Supplementary material
Source: ML conference proceedings conference paper supplement (https://proceedings.neurips.cc/paper_files/paper/2022/hash/0b4145b562cc22fb7fa50a2cd17c191d-Abstract.html)
Supplement: Supplementary file 1 [file 0b4145b562cc22fb7fa50a2cd17c191d-Supplemental-Conference.zip › ldsa_code/src/modules/agents/rnn_agent.py]

import torch.nn as nn
import torch.nn.functional as F


class RNNAgent(nn.Module):
    def __init__(self, input_shape, args):
        super(RNNAgent, self).__init__()
        self.args = args

        self.fc1 = nn.Linear(input_shape, args.rnn_hidden_dim)
        self.rnn = nn.GRUCell(args.rnn_hidden_dim, args.rnn_hidden_dim)
        self.fc2 = nn.Linear(args.rnn_hidden_dim, args.n_actions)

    def init_hidden(self):
        # make hidden states on same device as model
        return self.fc1.weight.new(1, self.args.rnn_hidden_dim).zero_()

    def forward(self, inputs, hidden_state):
        x = F.relu(self.fc1(inputs))
        h_in = hidden_state.reshape(-1, self.args.rnn_hidden_dim)
        h = self.rnn(x, h_in)
        q = self.fc2(h)
        return q, h
