# Supplementary material
Source: ML conference proceedings conference paper supplement (https://proceedings.neurips.cc/paper_files/paper/2022/hash/0b4145b562cc22fb7fa50a2cd17c191d-Abstract.html)
Supplement: Supplementary file 1 [file 0b4145b562cc22fb7fa50a2cd17c191d-Supplemental-Conference.zip › ldsa_code/src/runners/__init__.py]

REGISTRY = {}

from .episode_runner import EpisodeRunner
REGISTRY["episode"] = EpisodeRunner

from .parallel_runner import ParallelRunner
REGISTRY["parallel"] = ParallelRunner
