# Supplementary material
Source: ML conference proceedings conference paper supplement (https://proceedings.neurips.cc/paper_files/paper/2022/hash/0b4145b562cc22fb7fa50a2cd17c191d-Abstract.html)
Supplement: Supplementary file 1 [file 0b4145b562cc22fb7fa50a2cd17c191d-Supplemental-Conference.zip › ldsa_code/src/utils/dict2namedtuple.py]

from collections import namedtuple


def convert(dictionary):
    return namedtuple('GenericDict', dictionary.keys())(**dictionary)
